# Supplementary material for: Systemic impacts of disruptions at maritime chokepoints
Source: Research Square preprint supplement (doi:10.21203/rs.3.rs-5234319/v1), 2024-10-27
Supplement: Supplementary file 1 [file 1270ee0d414e6b3bcf58b92f.docx]

**Supplementary information**

**Systemic impacts of disruptions at maritime chokepoints**

Jasper Verschuur1,2,*, and Jim W. Hall1

1Oxford Programme for Sustainable Infrastructure Systems (OPSIS), Environmental Change Institute, University of Oxford, Oxford, United Kingdom

2Department of Engineering Systems and Services, Faculty of Technology, Policy and Management, Delft University of Technology, Delft, the Netherlands

*corresponding author: jasper.verschuur@eci.ox.ac.uk

Oxford Programme for Sustainable Infrastructure Systems (OPSIS), University of Oxford, 3 South Parks Road, Oxford OX1 3QY, United Kingdom

**Supplementary Figures**

**
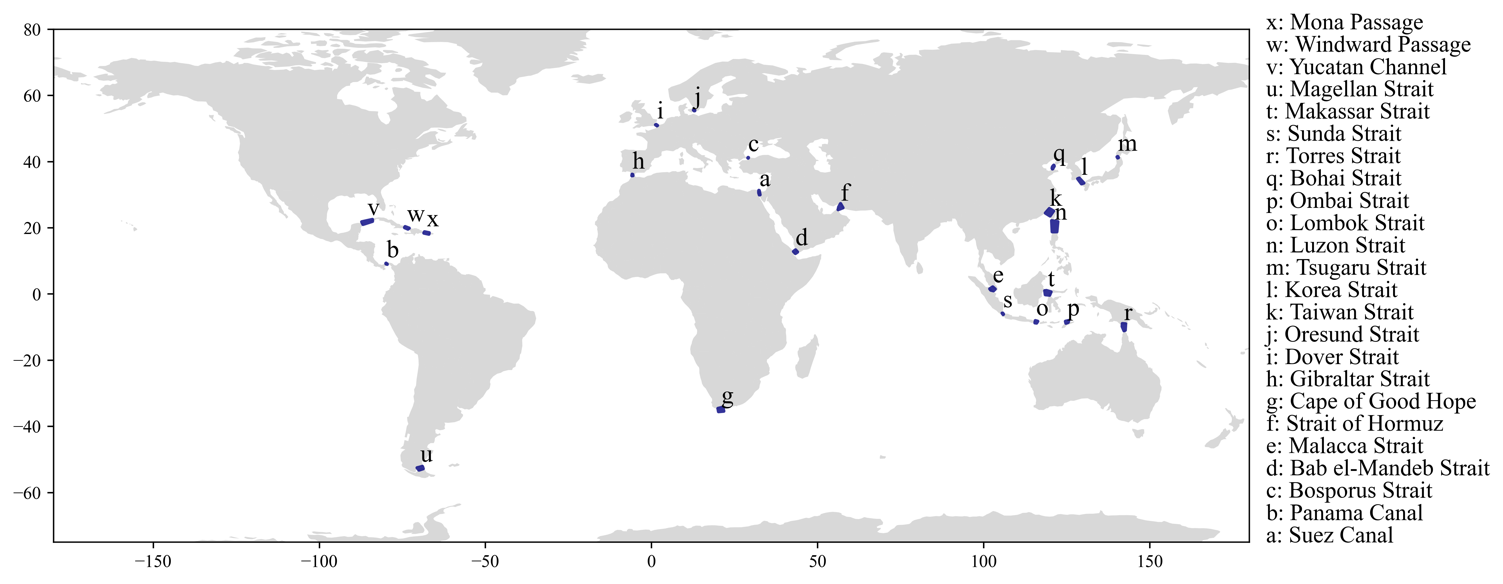
**

**Supplementary Figure 1. Geographical location of the 24 chokepoints considered.**

**
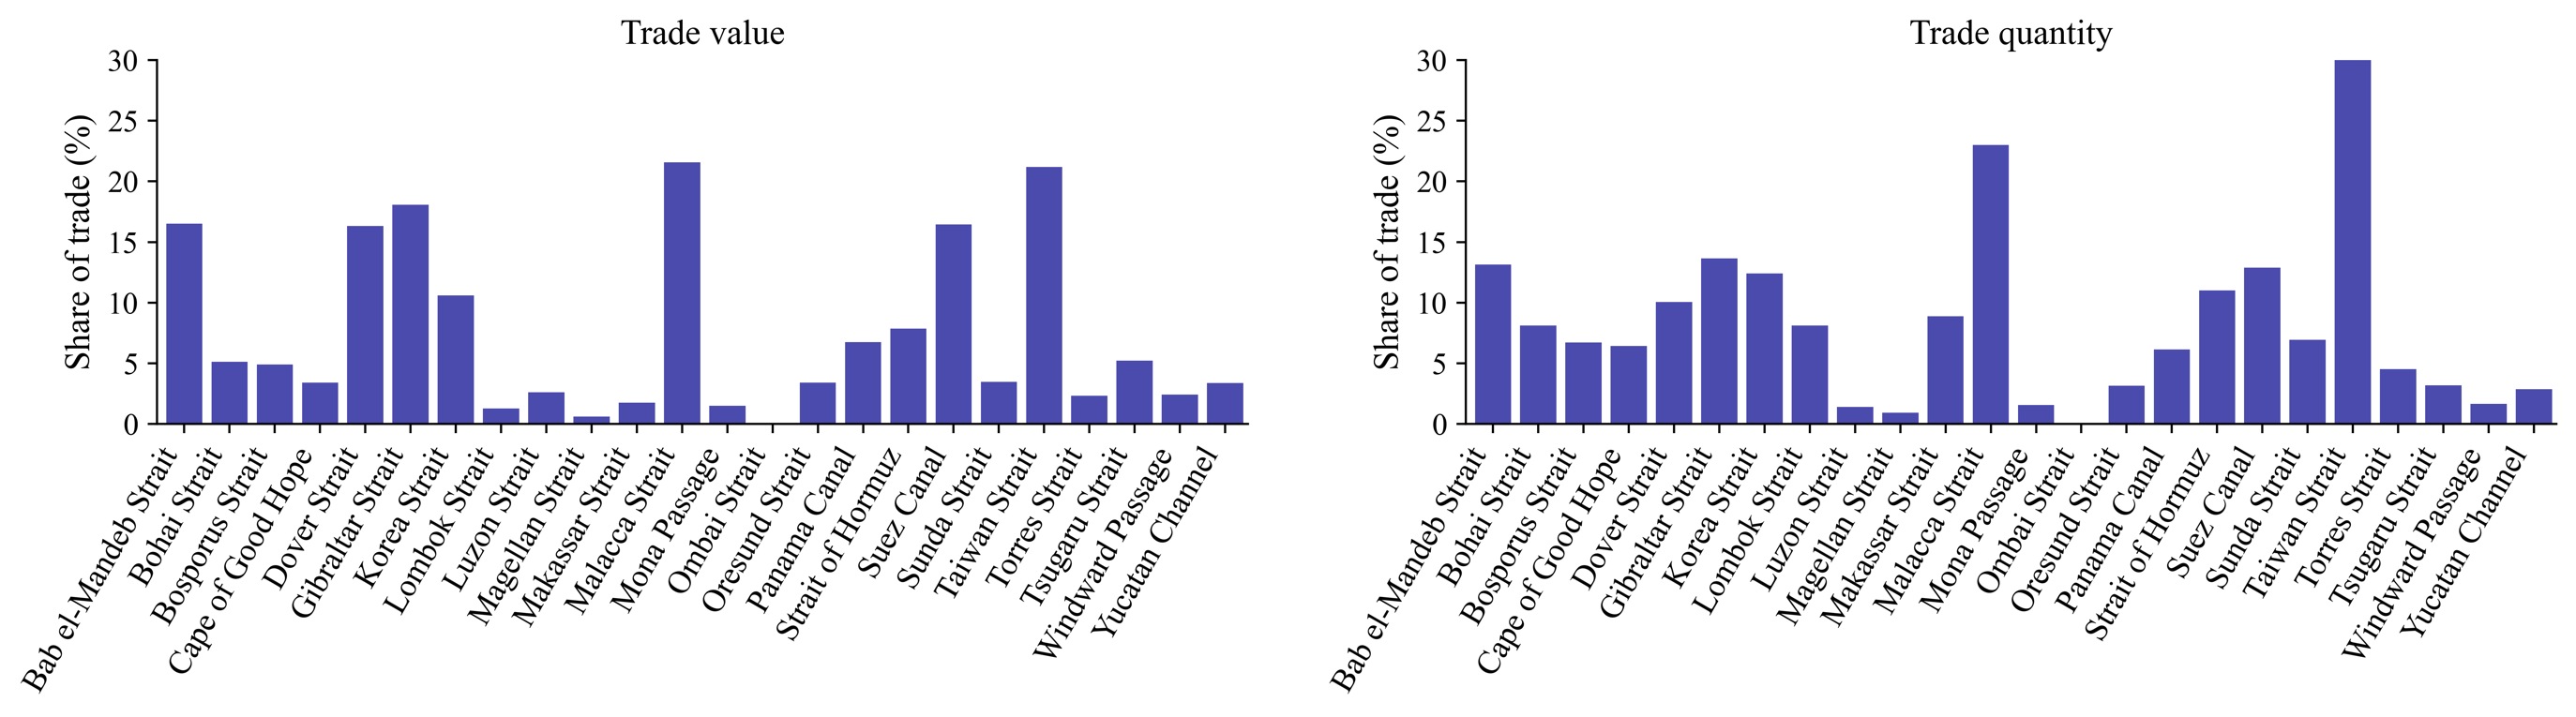
**

**Supplementary Figure 2. Share of global trade volume handled by different chokepoints.**

**
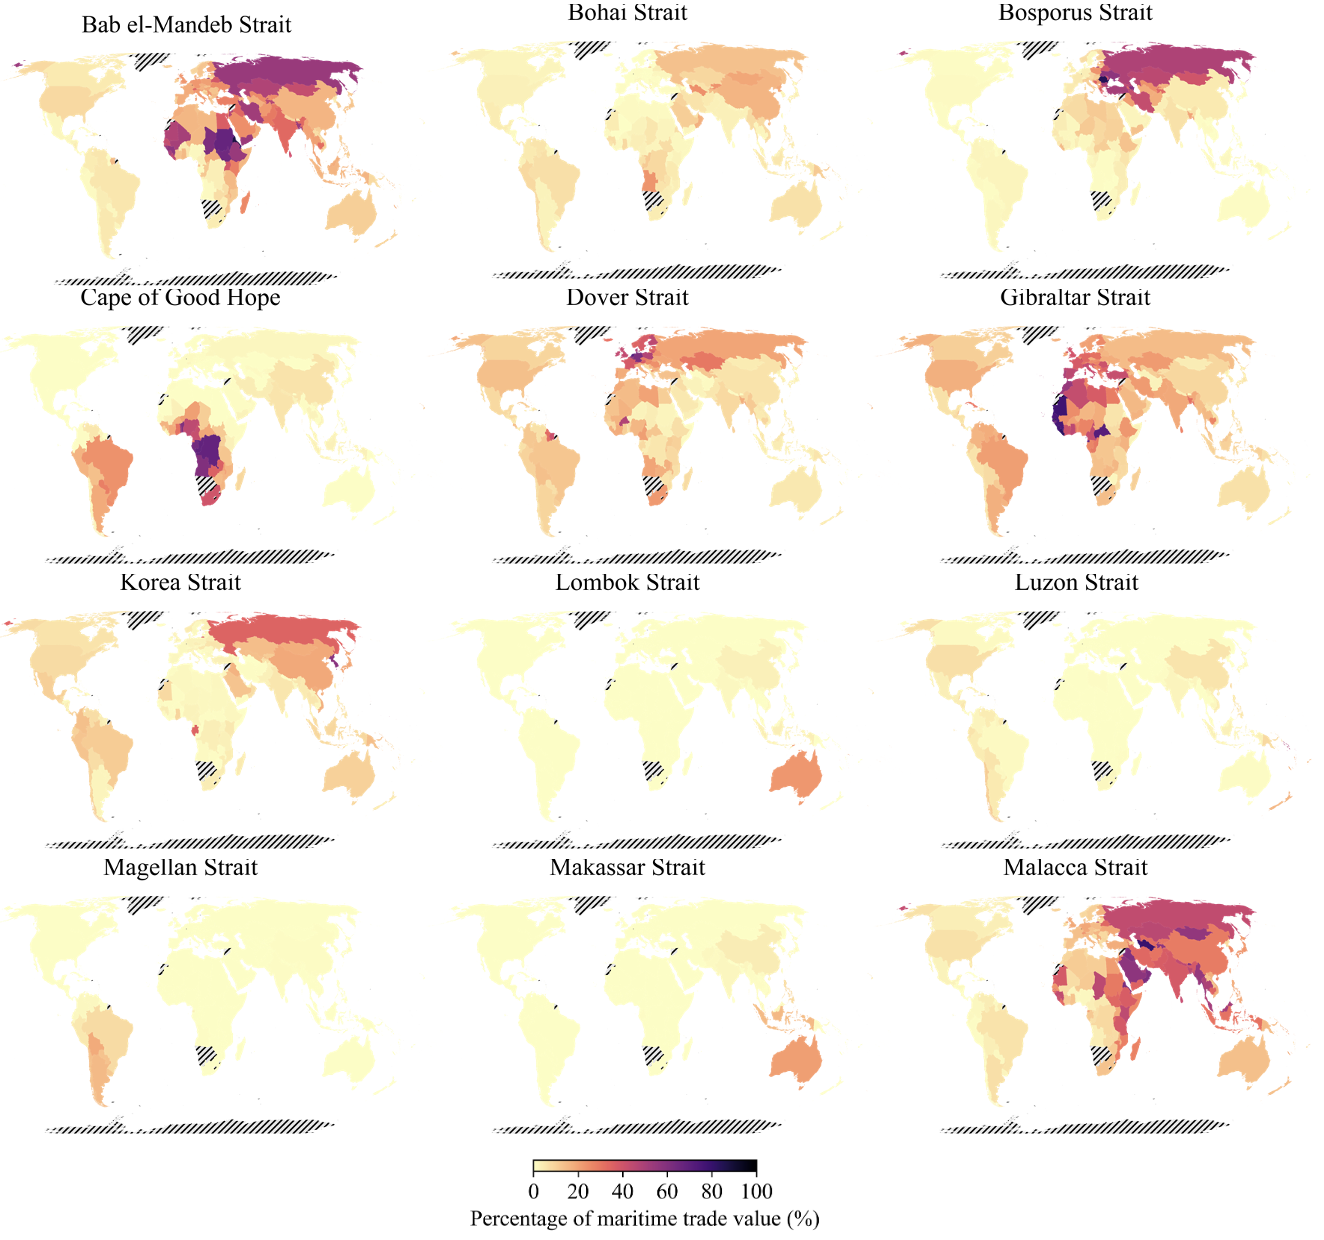
**

**
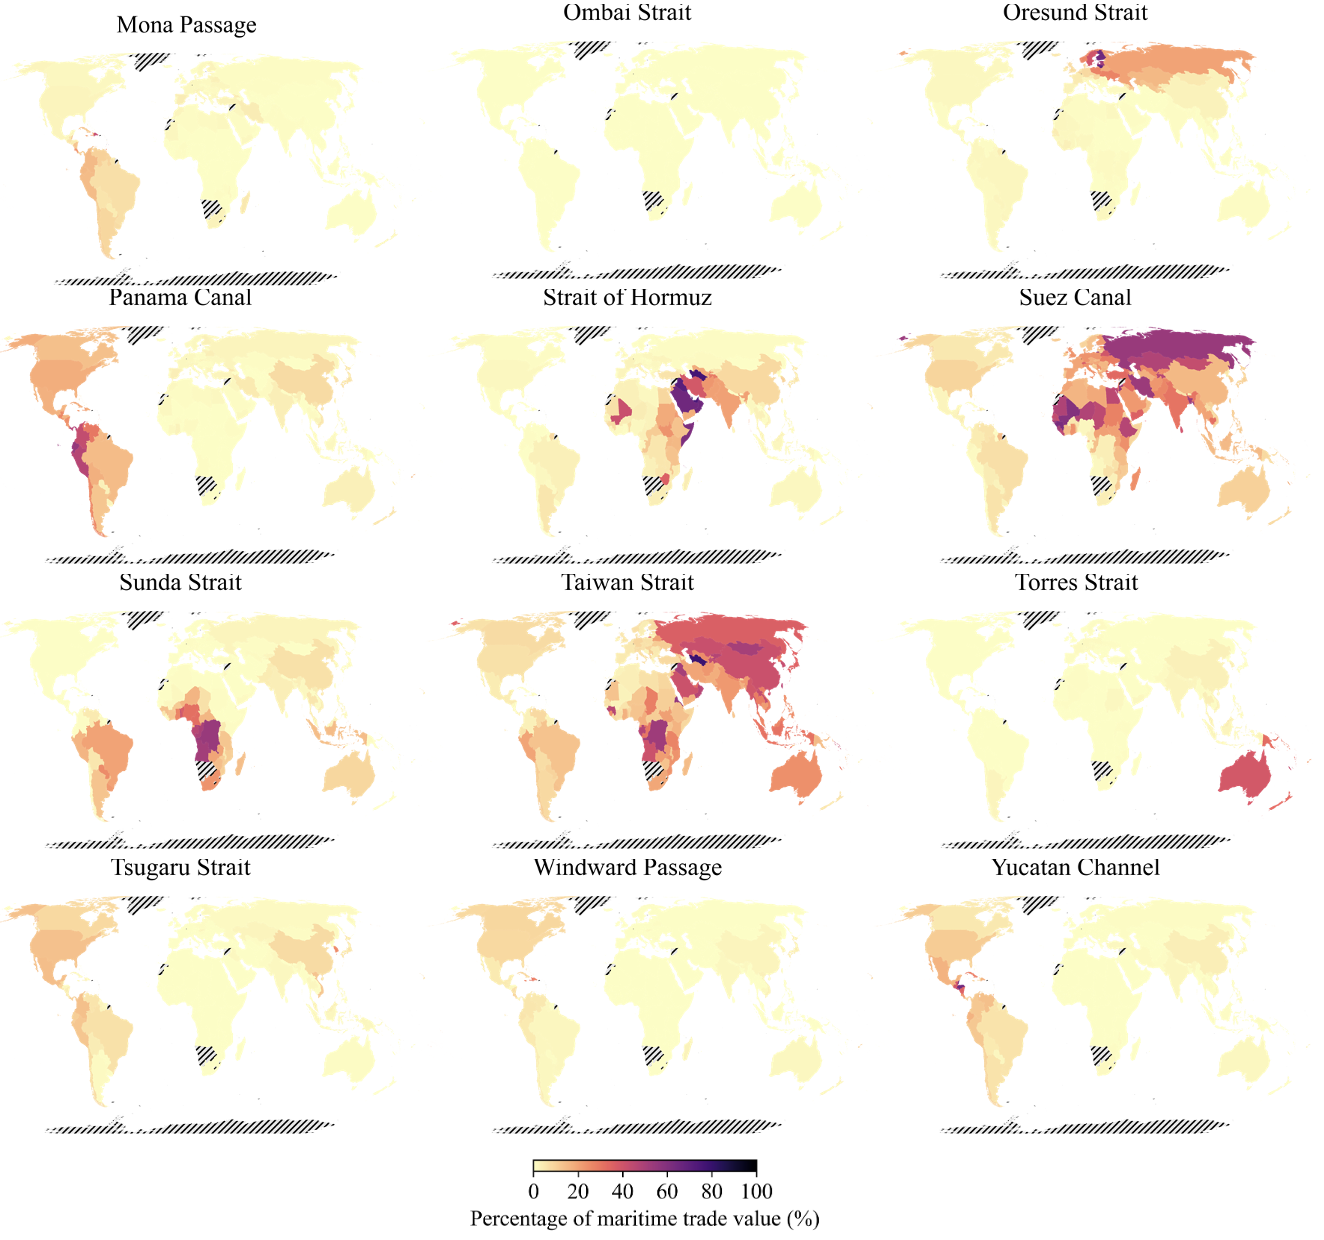
**

**Supplementary Figure 3. Country dependencies on specific chokepoints.**

**
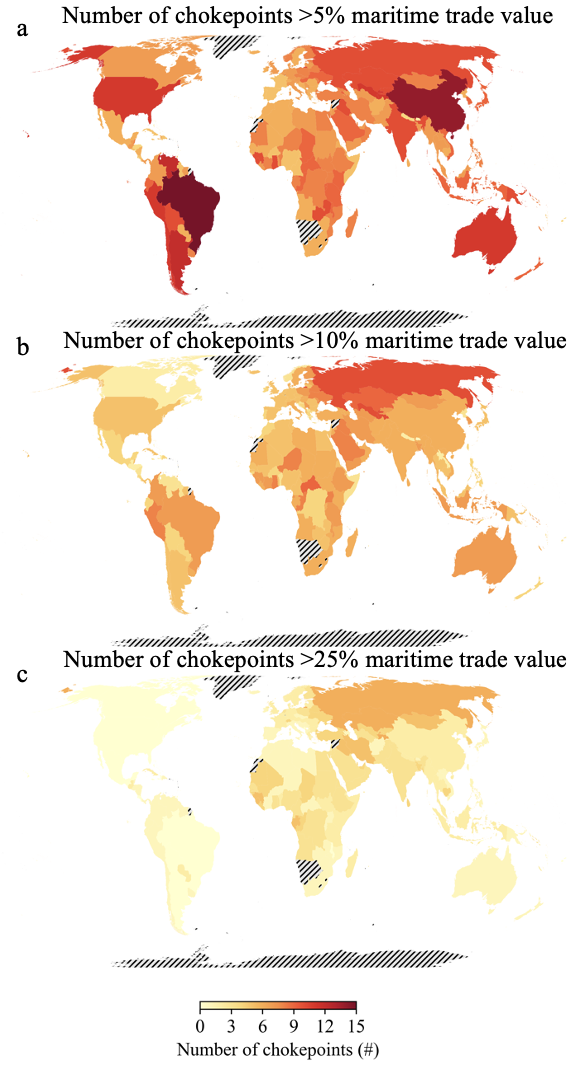
**

**Supplementary Figure 4. Major chokepoint dependencies.** Countries’ major chokepoint dependencies, defined as facilitating 5% (a), 10% (b) or 25% (c) of a country’s maritime trade value. Figures (a), (b) and (c) show the number of chokepoints, out of the 24 considered, that meet this criteria.

**
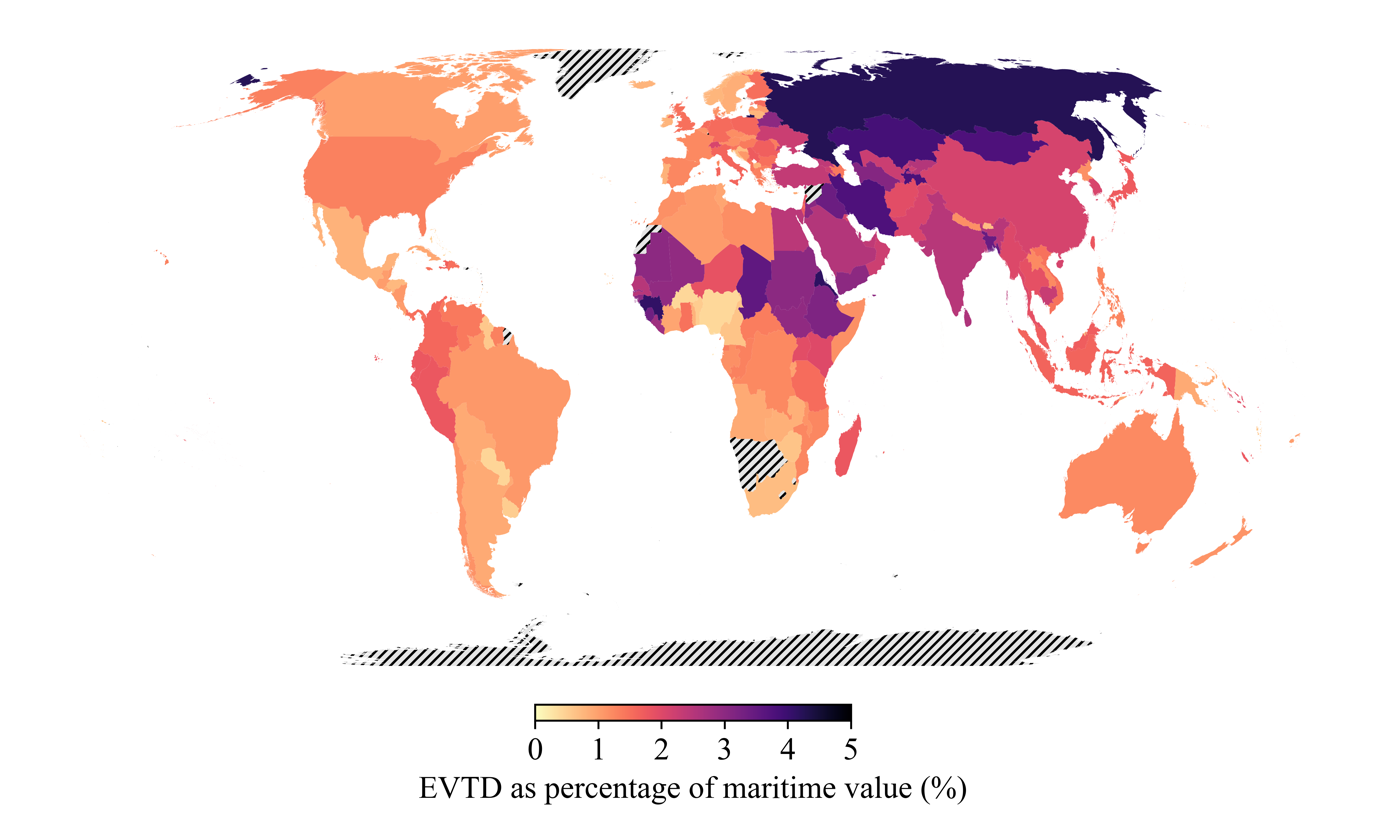
**

**Supplementary Figure 5. EVTD as percentage of maritime trade value.**

**
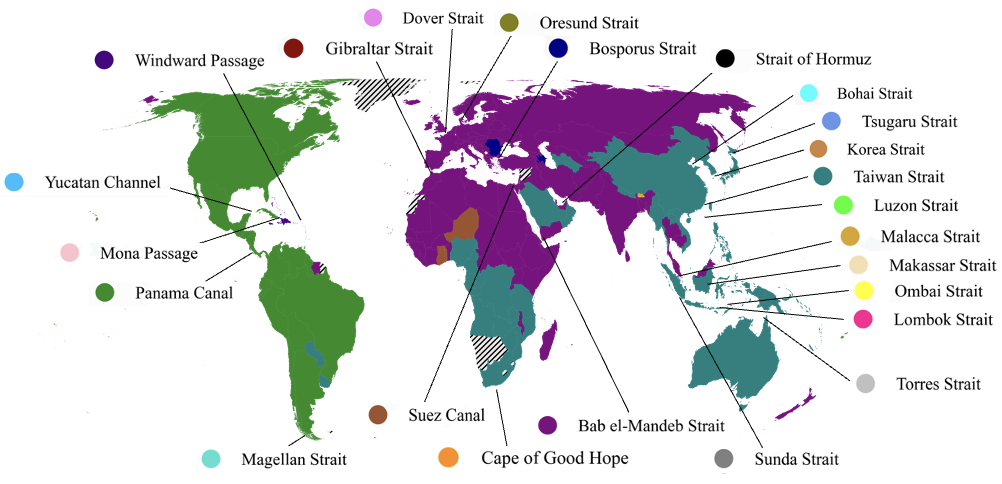
**

**Supplementary Figure 6. Dominant chokepoint of country EVTD**


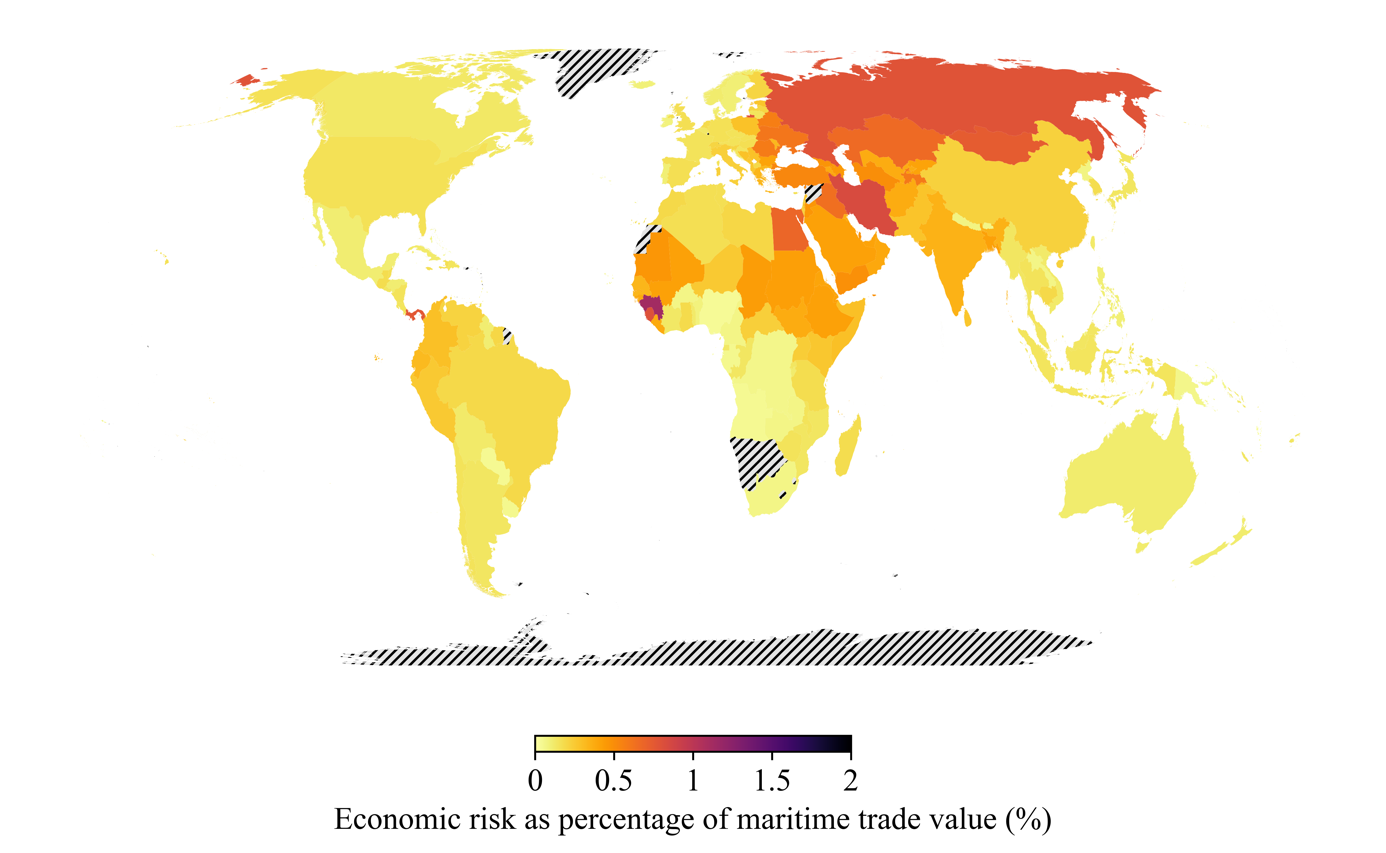


**Supplementary Figure 7. Economic risk as percentage of maritime trade value.**

**
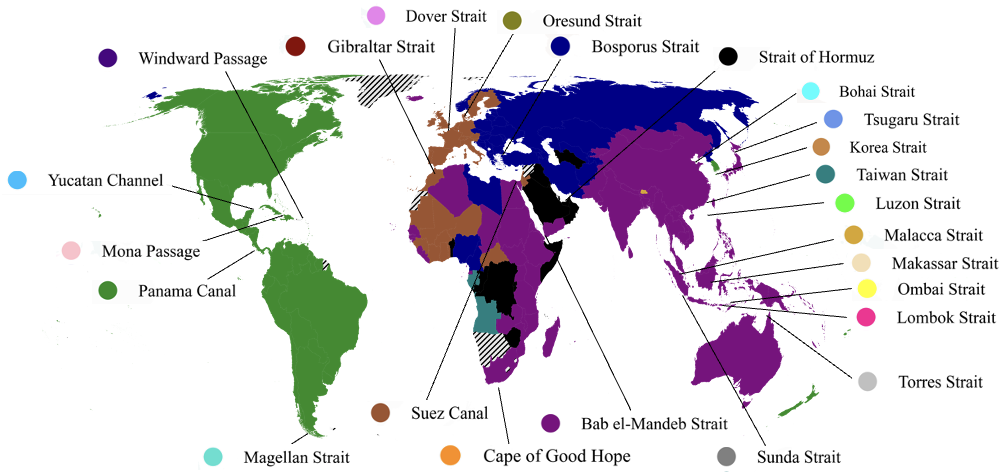
**

**Supplementary Figure 8. Dominant chokepoint of country economic risk**

**
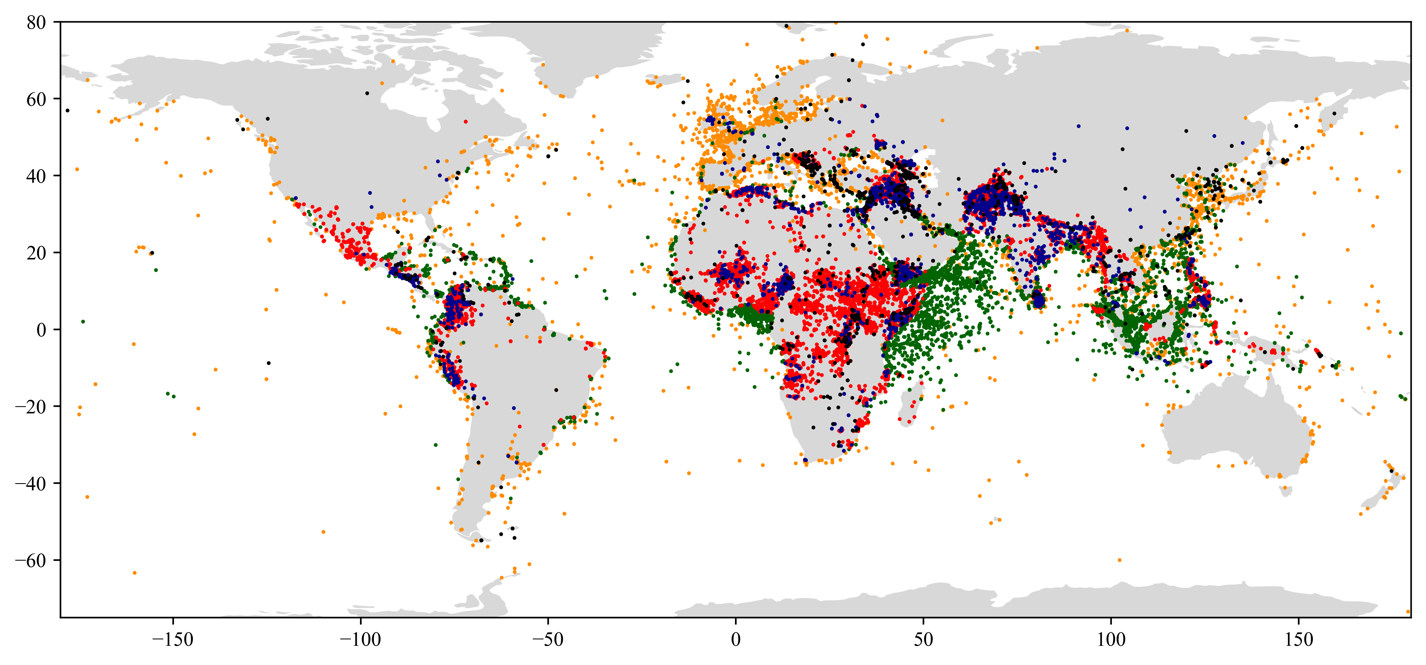
**

**Supplementary Figure 9. The spatial event database of maritime chokepoint hazards.** The geographical location of different non-climatic hazard events considered, including (i) piracy (green), (ii) maritime incidents (orange), (iii) terrorist attacks (blue), (iv) armed conflict (red), and (v) interstate conflict (black).
